# Supplementary material
Source: PubMed Central journal article supplement (PMC3904514)
Supplement: Supp_Fig1.pdf [file Supp_Fig1.pdf]

## Supplementary Data

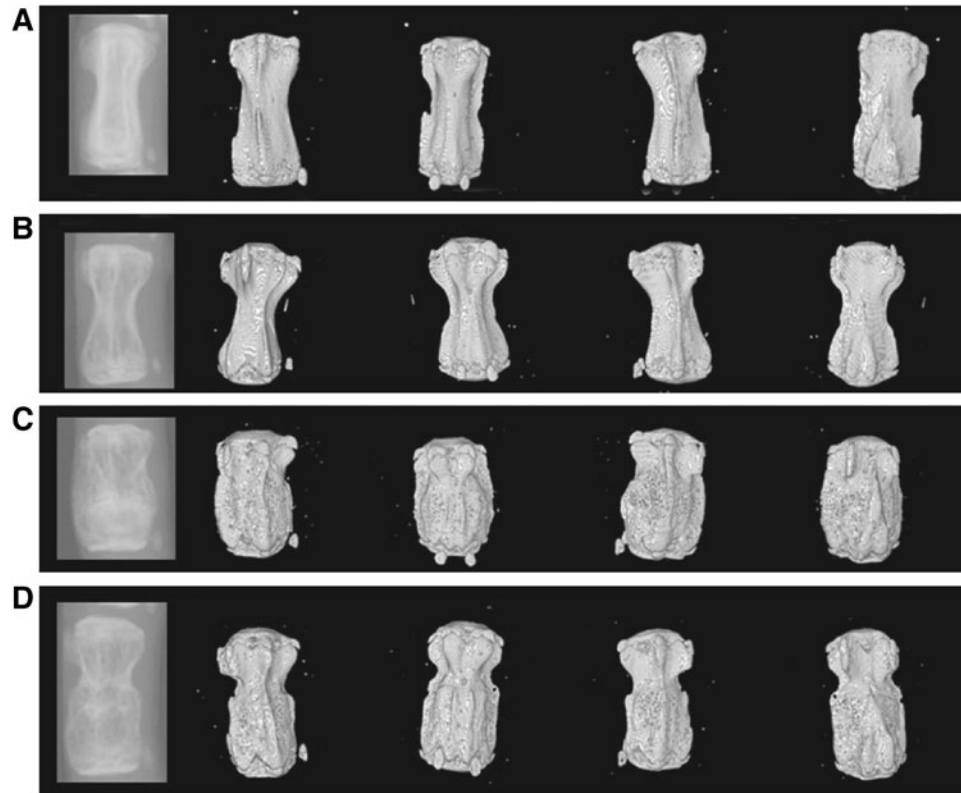

**SUPPLEMENTARY FIG. S1.** X-ray image of tail vertebra and the corresponding micro computerized tomography ( $\mu$ CT) images shown at four different points of rotation for (A) a normal wild-type vertebra, (B) a normal *oim* vertebra, (C) an *oim* vertebra with an obvious callus, (D) an *oim* vertebra with evidence of bone remodeling suggesting previous callus.
