# Supplementary material
Source: PubMed Central journal article supplement (PMC3904514)
Supplement: Supp_Fig2.pdf [file Supp_Fig2.pdf]

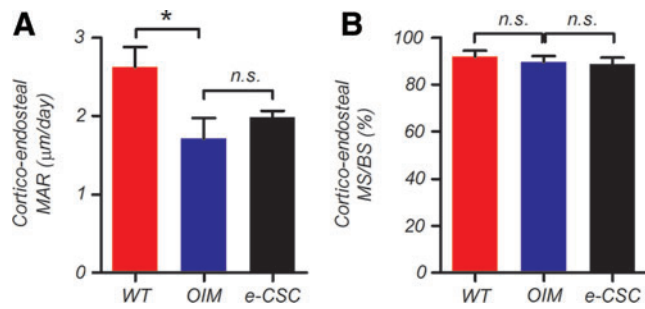

**SUPPLEMENTARY FIG. S2.** Parameters of bone formation for the endosteal region of the tibial cortex, analyzed from dual calcein labeling for 8-week-old wild-type (WT; *red*), nontransplanted *oim* (OIM; *blue*) and e-CSC transplanted *oim* (e-CSC; *black*). **(A)** Mineral apposition rate (MAR) in  $\mu\text{m}/\text{day}$ . **(B)** Percentage mineralizing surface per total bone surface (MS/BS). ns, Not significant;  $*P < 0.05$ ; Student's *t*-test. Error bars are SEM.
