# Supplementary material
Source: PubMed Central journal article supplement (PMC3904514)
Supplement: Supp_Fig3.pdf [file Supp_Fig3.pdf]

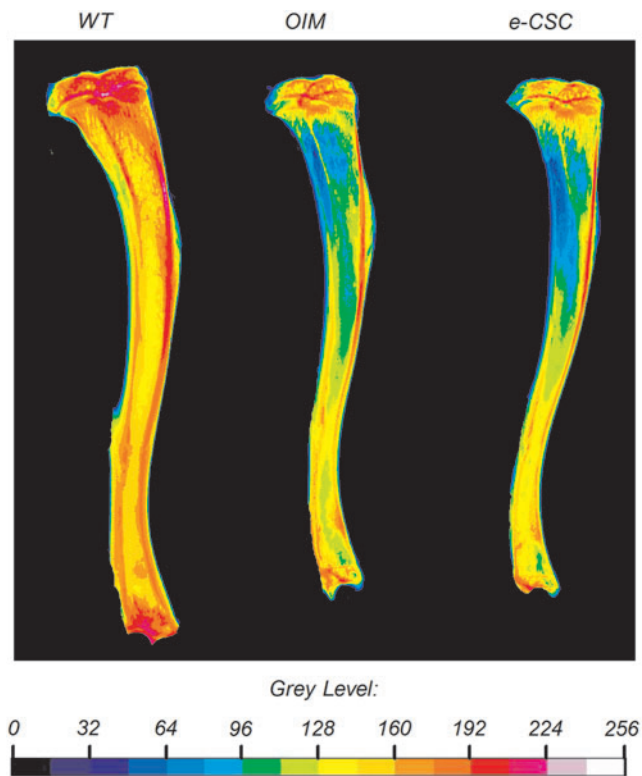

**SUPPLEMENTARY FIG. S3.** Digital X-ray images of tibia from 8-week-old wild-type (WT), nontransplanted *oim* (OIM) and *oim* transplanted with e-CSC (e-CSC), where gray level has been pseudocolored according to a 16-color palette; ranging from *black* (low mineralization density) to *white* (high mineralization density).
