# Supplementary material
Source: PubMed Central journal article supplement (PMC3904514)
Supplement: Supp_Fig4.pdf [file Supp_Fig4.pdf]

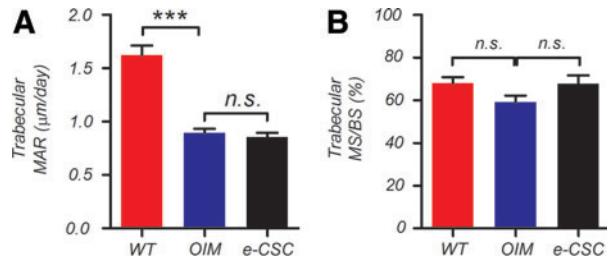

**SUPPLEMENTARY FIG. S4.** Parameters of bone formation for the tibial trabecular bone, analyzed from dual calcein labeling for 8-week-old wild-type (WT; *red*), nontransplanted *oim* (OIM; *blue*) and e-CSC transplanted *oim* (e-CSC; *black*). **(A)** MAR in  $\mu\text{m}/\text{day}$ . **(B)** Percentage MS/BS. ns, not significant;  $***P < 0.001$ ; Student's *t*-test. Error bars are SEM.
