# Supplementary material
Source: PubMed Central journal article supplement (PMC3904514)
Supplement: Supp_Fig5.pdf [file Supp_Fig5.pdf]

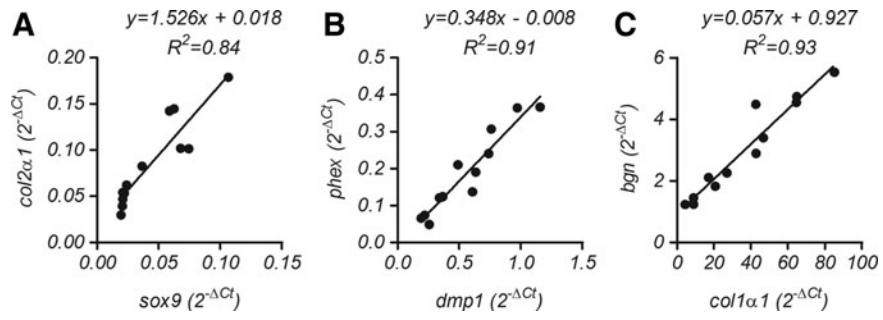

**SUPPLEMENTARY FIG. S5.** Linear correlations of gene expression (given as  $2^{-\Delta Ct}$  normalized to mouse  $\beta$ -actin and *hsp90ab1*) **(A)** *Sox9* and *Col2 $\alpha$ 1*, **(B)** *Dmp1* and *Phex*, **(C)** *Col1 $\alpha$ 1* and *Bgn*.
