# Supplementary material
Source: PubMed Central journal article supplement (PMC3904514)
Supplement: Supp_Table1.pdf [file Supp_Table1.pdf]

SUPPLEMENTARY TABLE S1. LIST OF ANTIBODIES USED FOR IMMUNOFLUORESCENCE (IF), IMMUNOHISTOCHEMISTRY (IH), AND WESTERN BLOT (WB)

| <i>Antibody</i> | <i>Host</i>     | <i>Application</i> | <i>Dilution</i> | <i>Supplier</i>                |
|-----------------|-----------------|--------------------|-----------------|--------------------------------|
| B-ACTIN         | Rabbit          | WB                 | 1:5,000         | Santa Cruz                     |
| CD105           | Mouse           | IF                 | 1:50            | BD (wwwbdbiosciences.com)      |
| CD14            | Mouse           | IF                 | 1:100           | Dako Cytomation (www.dako.com) |
| CD29            | Mouse           | IF                 | 1:100           | Abcam                          |
| CD34            | Mouse           | IF                 | 1:100           | Dako Cytomation                |
| CD44            | Mouse           | IF                 | 1:50            | Abcam                          |
| CD45            | Mouse           | IF                 | 1:100           | Dako Cytomation                |
| CD73            | Mouse           | IF                 | 1:50            | BD Biosciences                 |
| CD90            | Mouse           | IF                 | 1:100           | Abcam                          |
| COL1A2          | Rabbit          | WB                 | 1:1,000         | Abcam                          |
| HLAI            | Mouse           | IF                 | 1:100           | Dako Cytomation                |
| HLAII           | Mouse           | IF                 | 1:100           | Dako Cytomation                |
| OCT-4A          | Mouse           | IF                 | 1:2             | Santa Cruz                     |
| OCT-4A-PE       | Mouse           | FC                 | 1:10            | R&D Systems                    |
| SOX2            | Rabbit          | IF                 | 1:100           | Abcam                          |
| SOX2-PE         | Mouse           | FC                 | 1:10            | R&D Systems                    |
| SSEA4           | Mouse           | IF                 | 1:50            | Abcam                          |
| SSEA4-PE        | Mouse           | FC                 | 1:10            | R&D Systems                    |
| TRA-1-60        | Mouse           | IF, FC             | 1:10            | Santa Cruz                     |
| VIMENTIN        | Rabbit          | IF, IH             | 1:100           | Abcam                          |
| COLLAGEN X      | Mouse and human | IH                 | 1:100           | Abcam                          |
| OSTEOPONTIN     | Mouse and human | IH                 | 1:100           | Abcam                          |
