# Supplementary material
Source: PubMed Central journal article supplement (PMC3904514)
Supplement: Supp_Table2.pdf [file Supp_Table2.pdf]

SUPPLEMENTARY TABLE S2. LIST OF PRIMERS USED FOR RT-PCR AND QUANTITATIVE REAL-TIME PCR

| <i>Gene</i>                  | <i>Forward</i>                        | <i>Reverse</i>                        | <i>Accession number</i> |
|------------------------------|---------------------------------------|---------------------------------------|-------------------------|
| <i>Aggrecan</i> (mouse)      | 5'-GTT GGT TAC TTC GCC TCC AG-3'      | 5'-GTC CTC CAA GCT CTG TGA CC-3'      | NM_007424               |
| <i>β-ACTIN</i> (human)       | 5'-CTG GAA CGG TGA AGG TGA CA-3'      | 5'-AAG GGA CTT CCT GTA ACA AT GCA-3'  | NM_001101               |
| <i>β-ACTIN</i> (human-mouse) | 5'-GCT CCT CCT GAG CGC AAG TA-3'      | 5'-GAT GGA GGG GCC GGA CT-3'          | NM_001101<br>NM_007393  |
| <i>β-Actin</i> (mouse)       | 330001 PPM02945A                      | Qiagen (www.qiagen.com/)              | NM_007393               |
| <i>Col1α1</i> (mouse)        | 330001 PPM03845F                      | Qiagen                                | NM_007742               |
| <i>Col2α1</i> (mouse)        | 5'-CCT CCG TCT ACT GTC CAC TGA-3'     | 5'-ATT GGA GCC CTG GAT GAG CA-3'      | NM_001113515            |
| <i>Col10α1</i> (mouse)       | 330001 PPM05135F                      | Qiagen                                | NM_009925               |
| <i>Dmp1</i> (mouse)          | 330001 PPM04680E                      | Qiagen                                | NM_016779               |
| <i>Hsp90ab1</i> (mouse)      | 330001 PPM04803E                      | Qiagen                                | NM_008302               |
| <i>Igf1</i> (mouse)          | 330001 PPM03387E                      | Qiagen                                | NM_010512               |
| <i>OC</i> (human)            | 5'-CCT CAC ACT CCT CGC CCT ATT-3'     | 5'-CCC TCC TGC TTG GAC ACA AA-3'      | NM_199173               |
| <i>OP</i> (human)            | 5'-GCC GAC CAA GGA AAA CTC ACT A-3'   | 5'-CAG AAC TTC CAG AAT CAG CCT GTT-3' | NM_001040058            |
| <i>Osx</i> (mouse)           | 5'-AGG CAC AAA GAA GCC ATA C-3'       | 5'-AAT GAG TGA GGG AAG GGT-3'         | NM_130458               |
| <i>Phex</i> (mouse)          | 330001 PPM41830E                      | Qiagen                                | NM_011077               |
| <i>Pthrp</i> (mouse)         | 5'-GAA CAT CAG CTA CTG CAT GAC AAG-3' | 5'-TCT GAT TTC GGC TGT GTG GAT C-3'   | NM_008970               |
| <i>Runx2</i> (mouse)         | 5'-CCG GCC ACT TCG CTA ACT T-3'       | 5'-TGG TGC TCG GAT CTA CAG GAA-3'     | NM_009820               |
| <i>Smad3</i> (mouse)         | 330001 PPM04461B                      | Qiagen                                | NM_016769               |
| <i>Sox9</i> (mouse)          | 330001 PPM05134C                      | Qiagen                                | NM_011448               |
